# Supplementary material for: A glutamate receptor C-tail recruits CaMKII to suppress retrograde homeostatic signaling
Source: PubMed Central journal article supplement (PMC9741633; doi:10.1038/s41467-022-35417-9), 2022-12-10
Supplement: 41467_2022_35417_MOESM1_ESM.pdf [file 41467_2022_35417_MOESM1_ESM.pdf]

## **Supplementary Information**

**A glutamate receptor C-tail recruits CaMKII to suppress retrograde homeostatic signaling**

*Perry et al.*

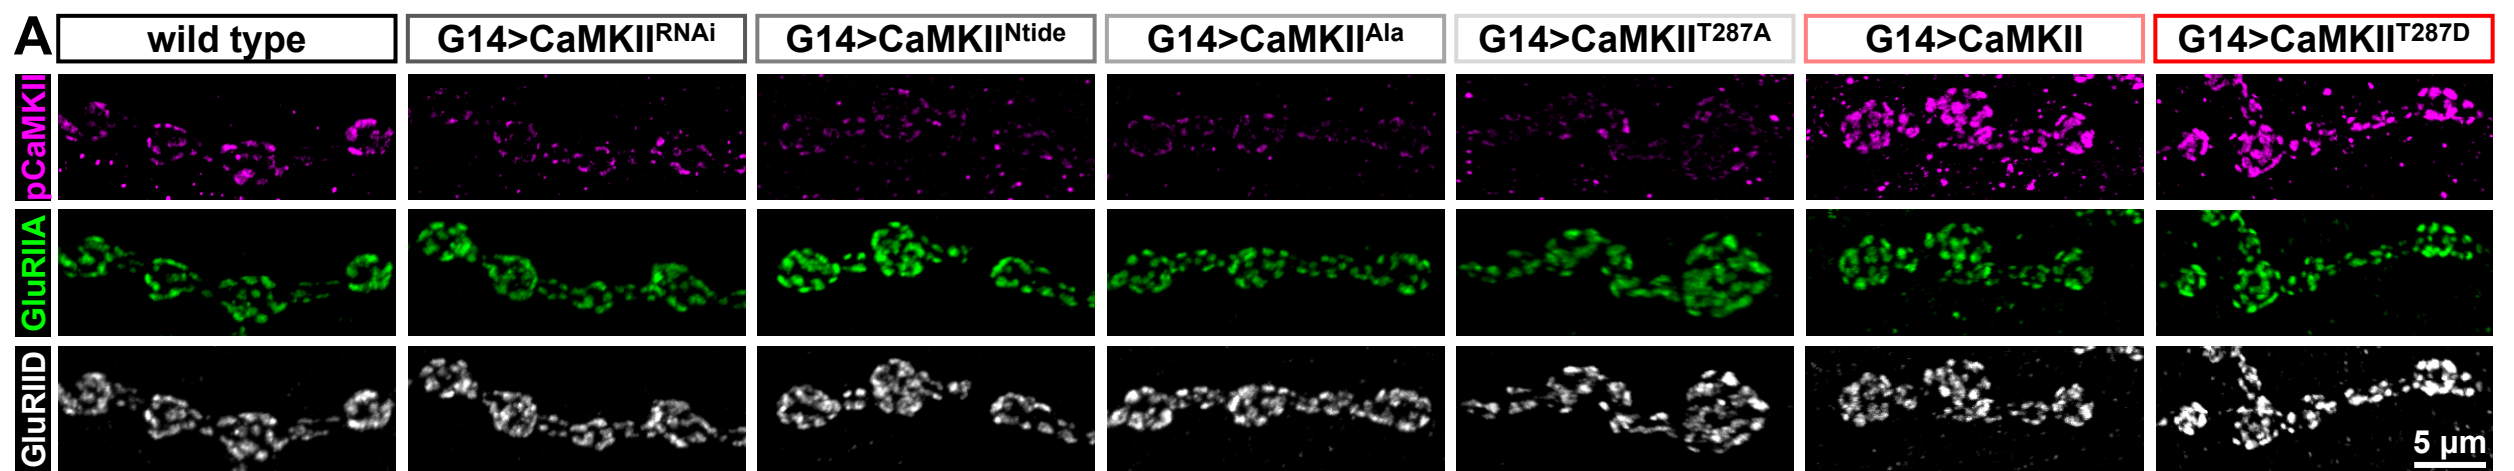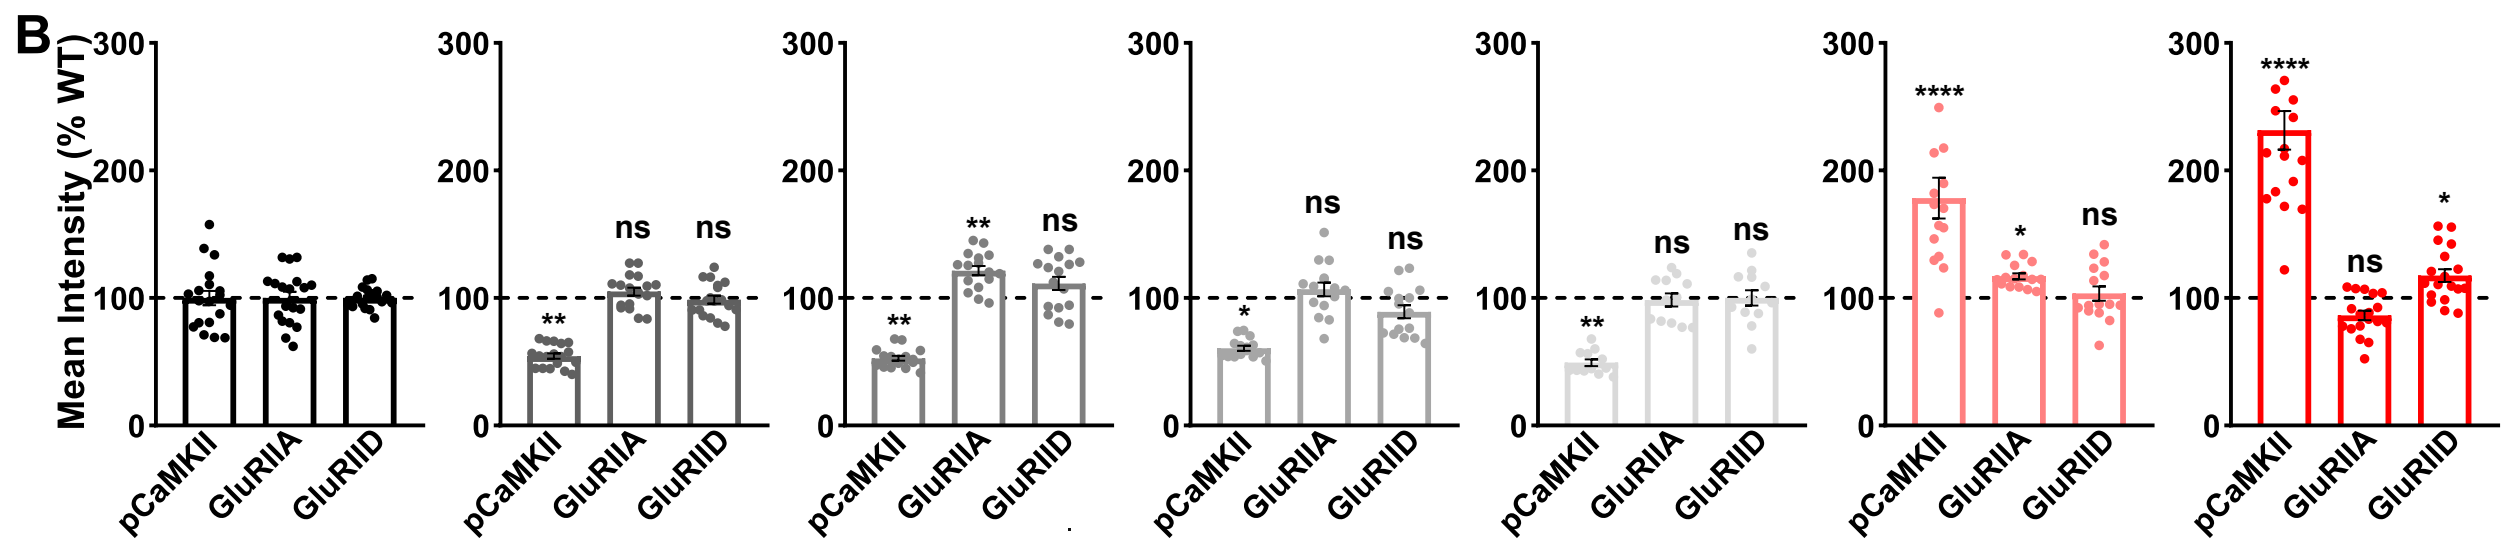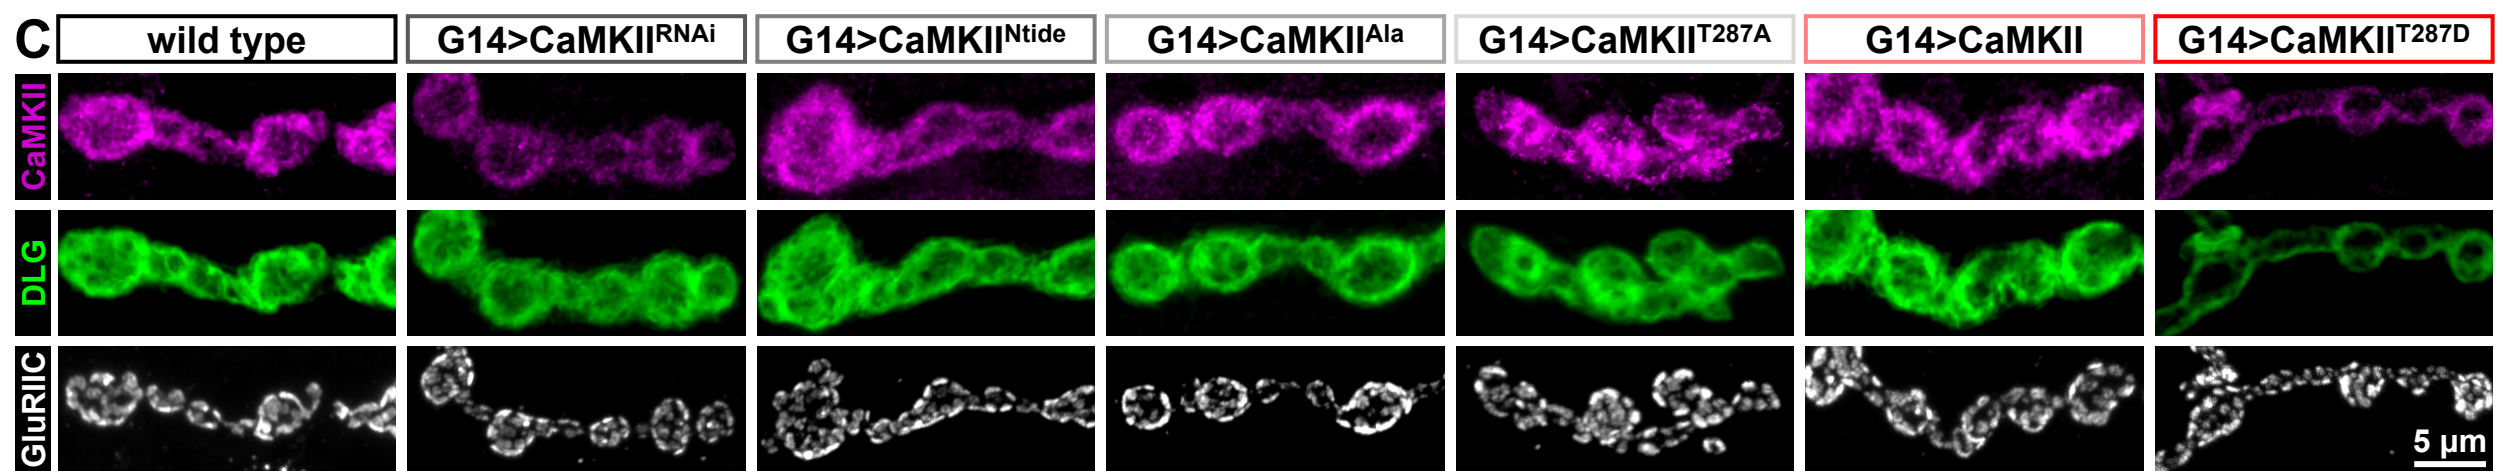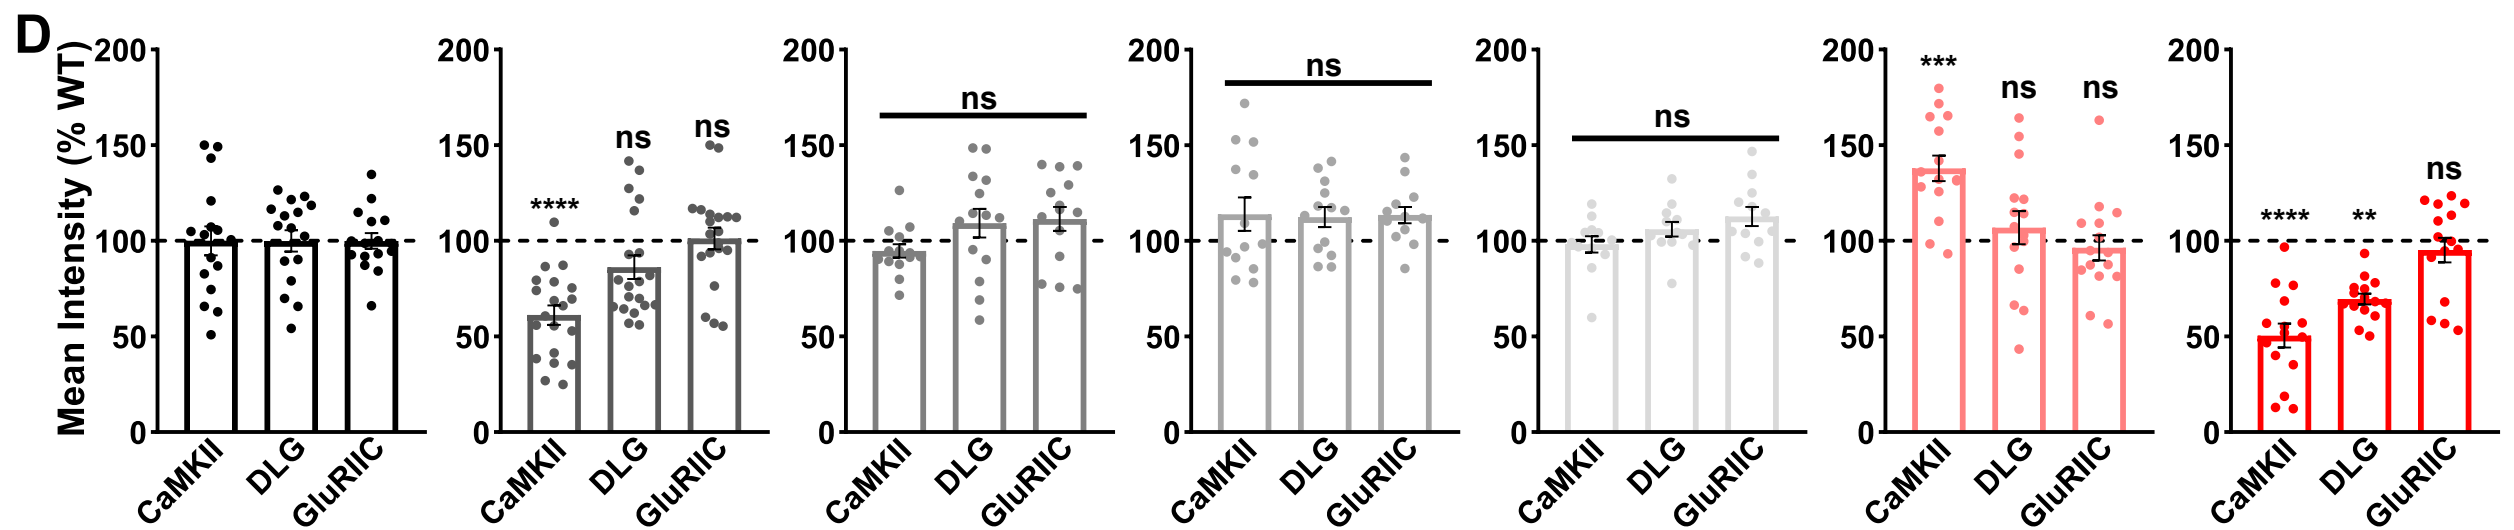

**Supplementary Figure S1: Validation of the anti-pCaMKII and -CaMKII antibodies. (A)** Representative images of NMJ boutons immunostained with anti-pCaMKII, -GluRIIA and -GluRIID antibodies in the indicated genotypes: G14>CaMKII<sup>RNAi</sup> (postsynaptic CaMKII knock down: *w;G14-GAL4/+;UAS-CaMKII<sup>RNAi</sup>/+*), G14>CaMKII<sup>Ntide</sup> (peptide inhibitor of CaMKII: *w;G14-GAL4/USA-CaMKII<sup>Ntide</sup>/+*), G14>CaMKII<sup>Ala</sup> (peptide inhibitor of CaMKII: *w;G14-GAL4/UAS-CaMKII<sup>Ala</sup>/+*), G14>CaMKII<sup>T287A</sup> (constitutively inactive CaMKII: *w;G14-GAL4/UAS-CaMKII<sup>T287A</sup>/+*); G14>CaMKII (CaMKII overexpression: *w;G14-GAL4/+;UAS-CaMKII/+*), G14>CaMKII<sup>T287D</sup> (constitutively active CaMKII: *w;G14-GAL4/UAS-CaMKII<sup>T287D</sup>*). Experiments were repeated three times independently with similar results. **(B)** Quantification of mean fluorescence intensity of pCaMKII, GluRIIA and GluRIID puncta normalized to wild-type values. (wild type: n=19; G14>CaMKII<sup>RNAi</sup>, n=18, p=0.0012 for pCaMKII, p=0.8801 for GluRIIA, p=0.9997 for GluRIID; G14>CaMKII<sup>Ntide</sup>: n=16, p=0.0011 for pCaMKII, p=0.0013 for GluRIIA, p=0.2781 for GluRIID; G14>CaMKII<sup>Ala</sup>: n=15, p=0.0112 for pCaMKII, p=0.7049 for GluRIIA, p=0.3413 for GluRIID; G14>CaMKII<sup>T287A</sup>: n=12, p=0.0014 for pCaMKII, p=0.9996 for GluRIIA, p>0.9999 for GluRIID; G14>CaMKII: n=15, p<0.0001 for pCaMKII, p=0.0190 for GluRIIA, p=0.9871 for GluRIID; G14>CaMKII<sup>T287D</sup>: n=18, p<0.0001 for pCaMKII, p=0.0644 for GluRIIA, p=0.0218 for GluRIID). Repeated measures One-way ANOVA with Dunnett's multiple comparisons test with a significance value of 0.05; p-value was adjusted for multiple comparison. GluRIIA levels are unexpectedly increased in G14>CaMKII<sup>Ntide</sup>, which may be caused by developmental changes in the postsynaptic apparatus due to strong and constitutive inhibition of CaMKII activity. **(C)** Representative images of NMJ boutons immunostained with anti-CaMKII, -DLG and -GluRIIC antibodies in the same genotypes in (A). Experiments were repeated four times independently with similar results. **(D)** Quantification of mean fluorescence intensity of CaMKII, DLG, and GluRIIC puncta normalized to wild-type values. (wild type: n=16; G14>CaMKII<sup>RNAi</sup>, n=20, p<0.0001 for CaMKII, p=0.3428 for DLG, p=0.9997 for GluRIIC; G14>CaMKII<sup>Ntide</sup>: n=14, p=0.9814 for CaMKII, p=0.7943 for DLG, p=0.5294 for GluRIIC; G14>CaMKII<sup>Ala</sup>: n=13, p=0.4469 for CaMKII, p=0.5515 for DLG, p=0.3793 for GluRIIC; G14>CaMKII<sup>T287A</sup>: n=12, p=0.9997 for CaMKII, p=0.9689 for DLG, p=0.4644 for GluRIIC; G14>CaMKII: n=15, p=0.0002 for CaMKII, p=0.9259 for DLG, p=0.9946 for GluRIIC; G14>CaMKII<sup>T287D</sup>: n=15, p<0.0001 for CaMKII, p=0.0033 for DLG, p=0.9785 for GluRIIC). Repeated measures One-way ANOVA with Dunnett's multiple comparisons test with a significance value of 0.05. p-value was adjusted for multiple comparison. Error bars indicate  $\pm$  SEM. Asterisks indicate statistical significance using One-way ANOVA: \*P<0.05, \*\*P<0.01, \*\*\*P<0.001, \*\*\*\*P<0.0001; ns, not significant. n values indicate biologically independent NMJs. Source data are provided as a Source Data file.

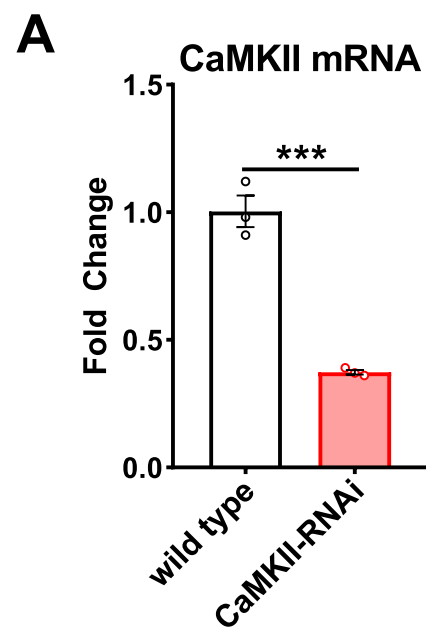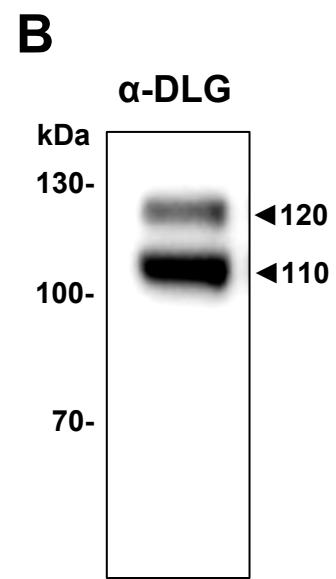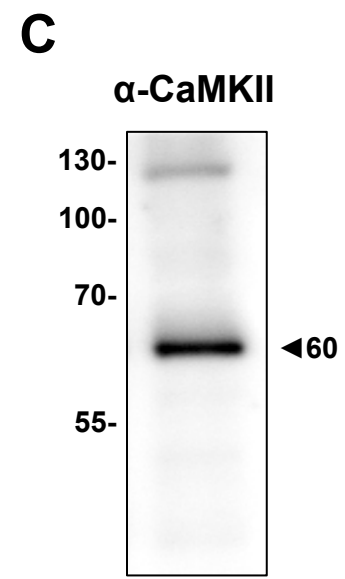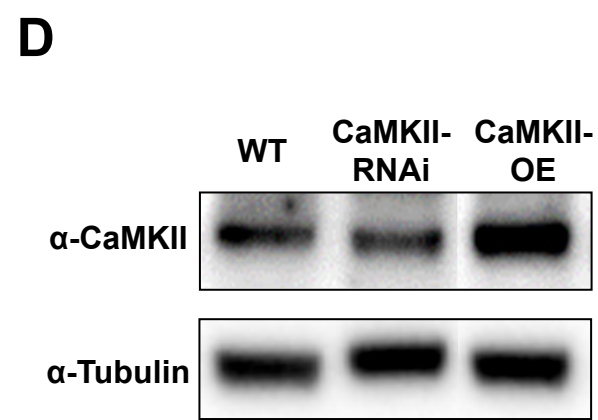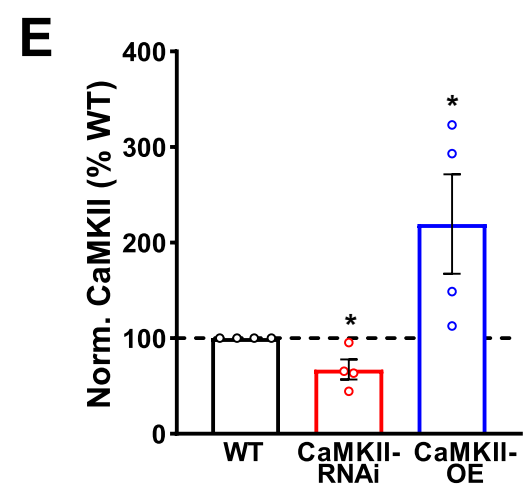

**Supplementary Figure S2: Muscle CaMKII is expressed as a single 60 kDa band on immunoblots.**

**(A)** qPCR analysis showing an ~60% reduction in CaMKII mRNA levels following muscle-specific RNAi knock-down. (wild type: n=3; CaMKII-RNAi, n=3, p=0.0005, unpaired, two-tailed t-test) **(B)** Anti-DLG immunoblot from wild-type larval muscle lysates. Note the two isoforms of DLG are clearly observed, corresponding to DLGA (~110 kDa) and DLGS97 (~120 kDa). **(C)** Anti-CaMKII immunoblot from wild-type muscle lysates. Note that *Drosophila* CaMKII runs as single band at ~60 kDa, as expected. **(D)** Anti-CaMKII immunoblots from muscle lysates of wild type, CaMKII-RNAi (G14>CaMKII<sup>RNAi</sup>), and CaMKII-OE (G14>CaMKII). Anti- $\beta$ -tubulin blots are shown below as loading controls. **(E)** The quantification shows CaMKII/ $\beta$ -tubulin intensity ratios (normalized to wild type controls) averaged from 4 replicates per genotype (12 larvae per genotype). (wild type: n=4; CaMKII-RNAi, n=4, p=0.0286; CaMKII-OE, n=4, p=0.0286, paired, two-tailed t-test). Error bars indicate  $\pm$ SEM. Asterisks indicate statistical significance using One-way ANOVA: \*P<0.05, \*\*\*P<0.001. Source data are provided as a Source Data file.

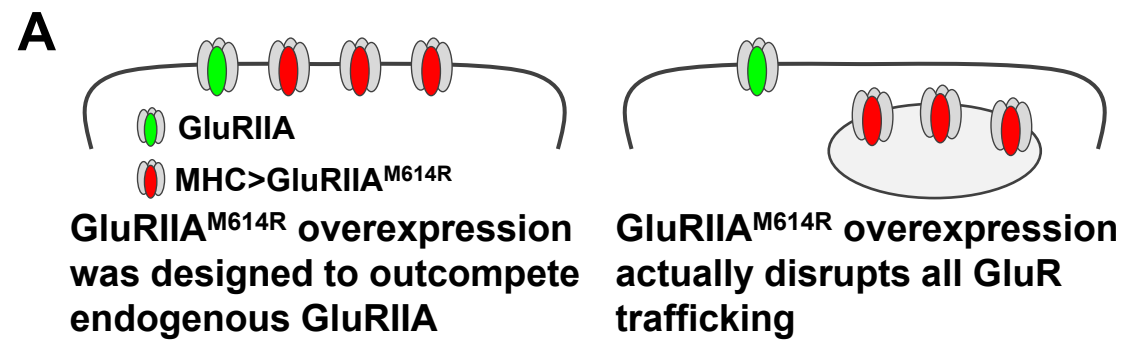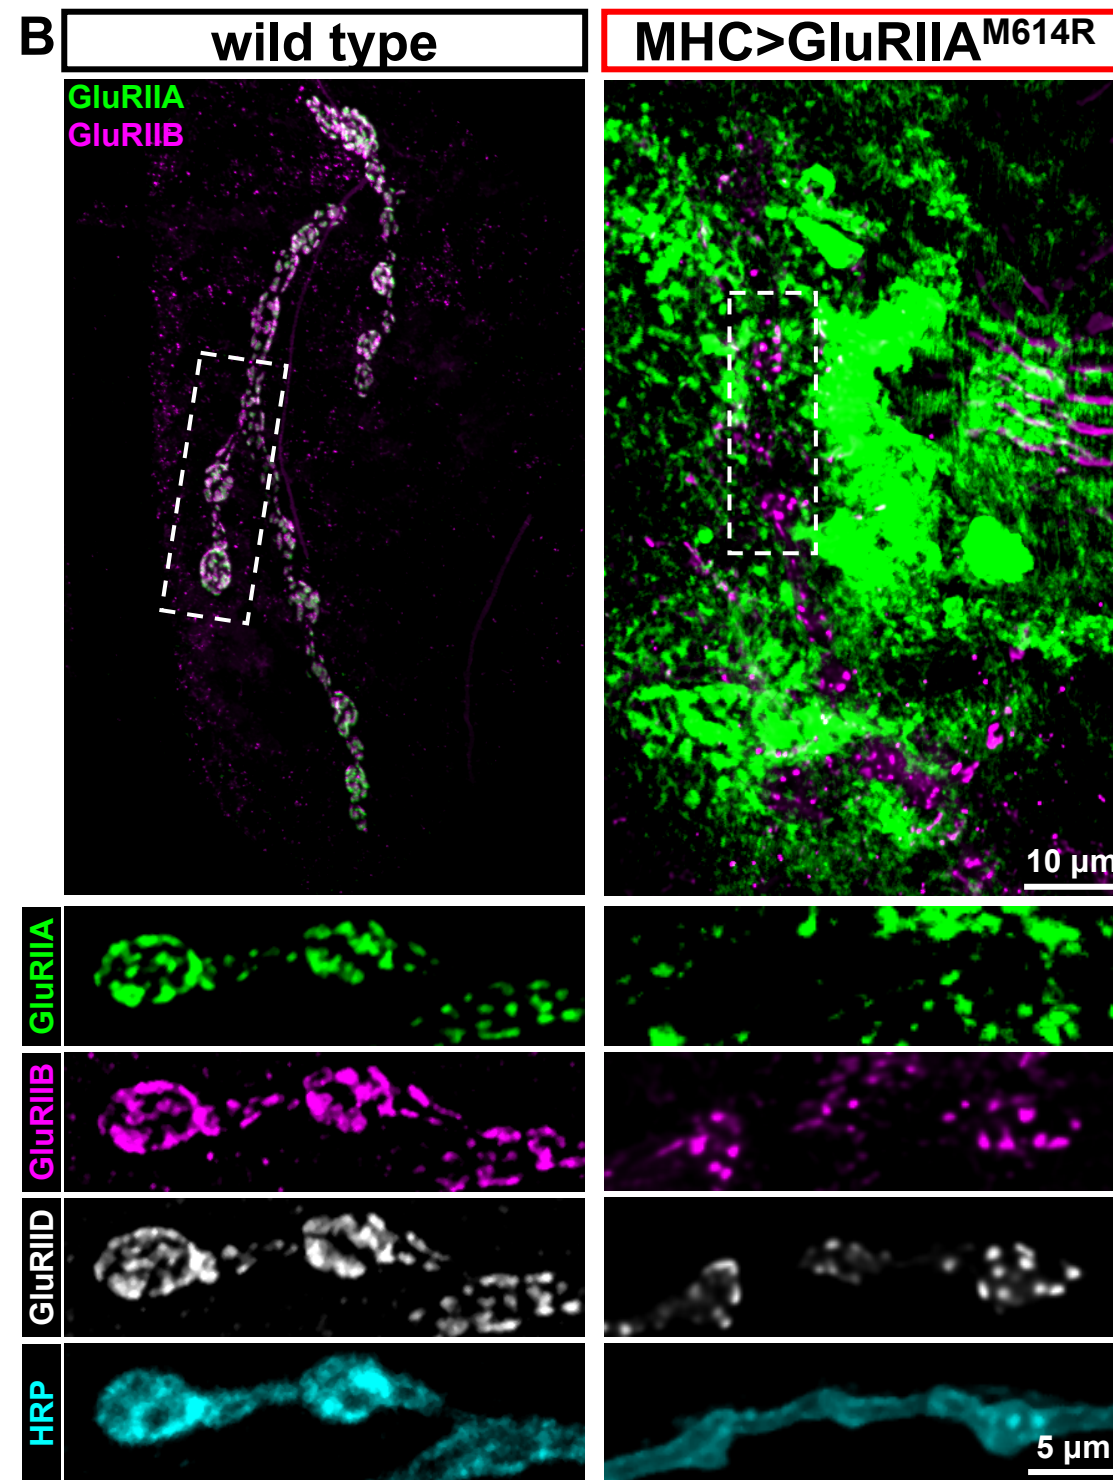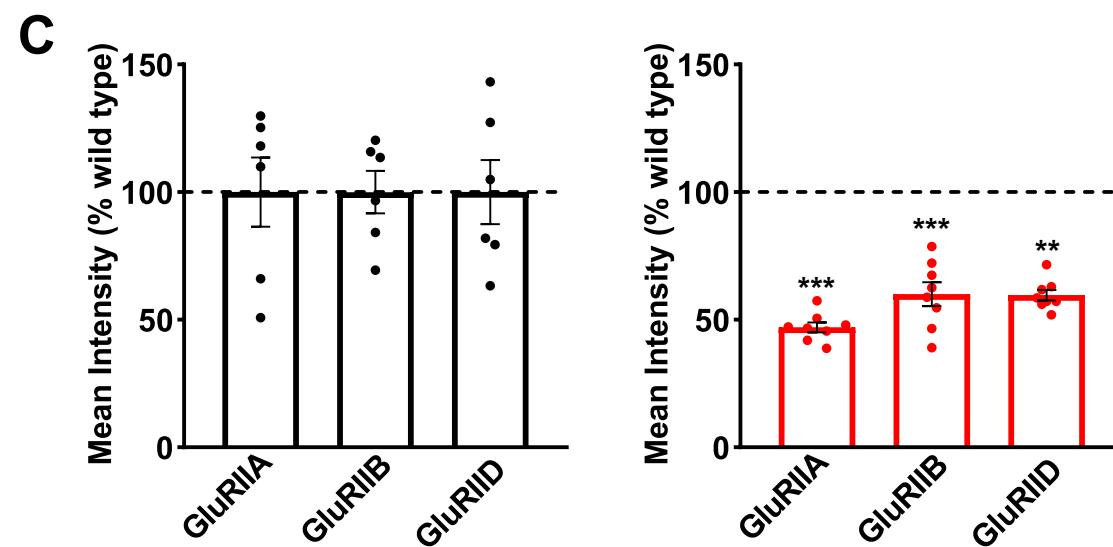

**Supplementary Figure S3: Postsynaptic *GluRIIA*<sup>M614R</sup> overexpression disrupts GluR trafficking. (A)** Schematic illustrating the expected and actual GluRA and GluRB receptor distributions at postsynaptic compartments in wild type and postsynaptic *GluRIIA*<sup>M614R</sup> overexpression. **(B)** Representative images of muscle 4 NMJs immunostained with anti-GluRIIA, -GluRIIB, -GluRIID and -HRP antibodies in wild type or postsynaptic overexpression of the *GluRIIA*<sup>M614R</sup> transgene: MHC>GluRIIA<sup>M614R</sup> (*w*;+;*MHC-GAL4/UAS-GluRIIA*<sup>M614R</sup>). Note that all GluRs are reduced at postsynaptic compartments in MHC>GluRIIA<sup>M614R</sup>, with high levels of GluRIIA apparently accumulating in intracellular muscle compartments. Experiments were repeated three times independently with similar results. **(C)** Quantification of mean fluorescence intensities of GluRIIA, GluRIIB and GluRIID subunits at NMJs normalized to wild-type values (wild type: n=6; MHC>CaMKII<sup>M614R</sup>: n=8, p=0.0007 for GluRIIA, p=0.0007 for GluRIIB, p=0.0032 for GluRIID, unpaired, two-tailed t-test, with a significance value of 0.05). Error bars indicate  $\pm$ SEM. \*\*P<0.01, \*\*\*P<0.001. n values indicate biologically independent NMJs. Source data are provided as a Source Data file.

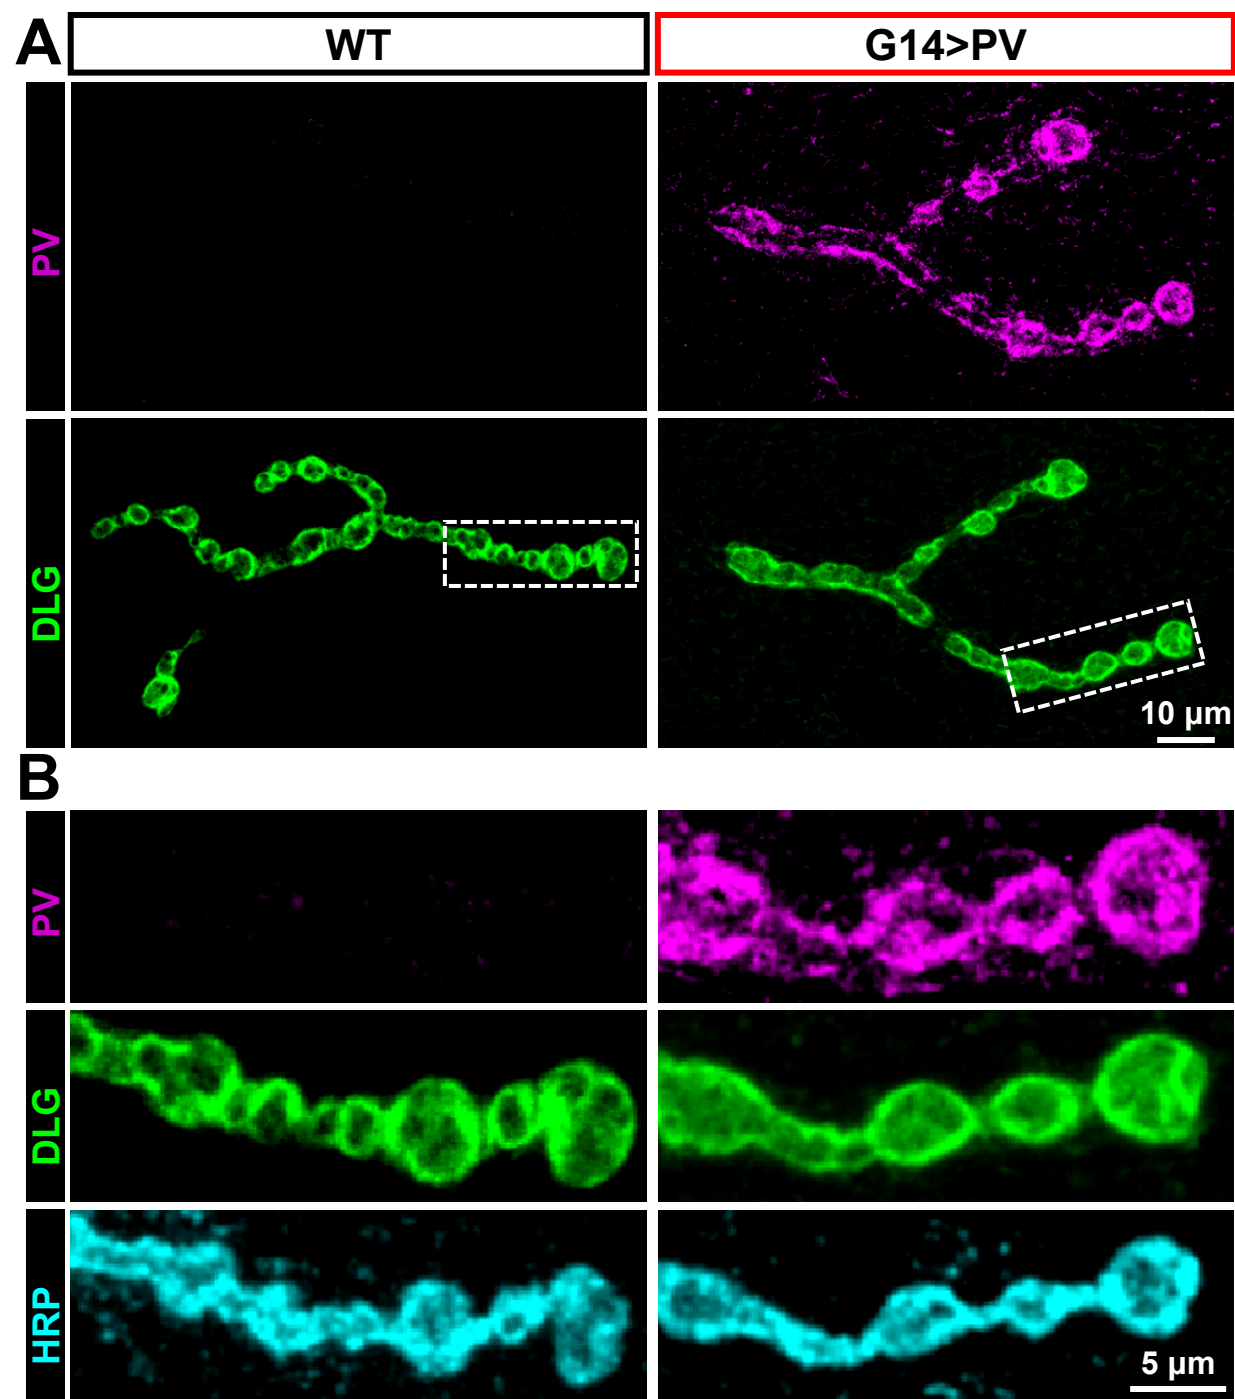



**Supplementary Figure S4: Parvalbumin localizes to postsynaptic compartments when expressed in muscle. (A)** Representative images of NMJs immunostained with anti-parvalbumin (PV) and -DLG in wild type and postsynaptic expression of PV: *G14>PV (w;G14-GAL4/+;UAS-PV/+)*. **(B)** Images of individual boutons stained with anti-PV, -DLG and -HRP in the indicated genotypes showing that PV largely overlaps with the postsynaptic density marker DLG. **(A, B)** Experiments were repeated four times independently with similar results.

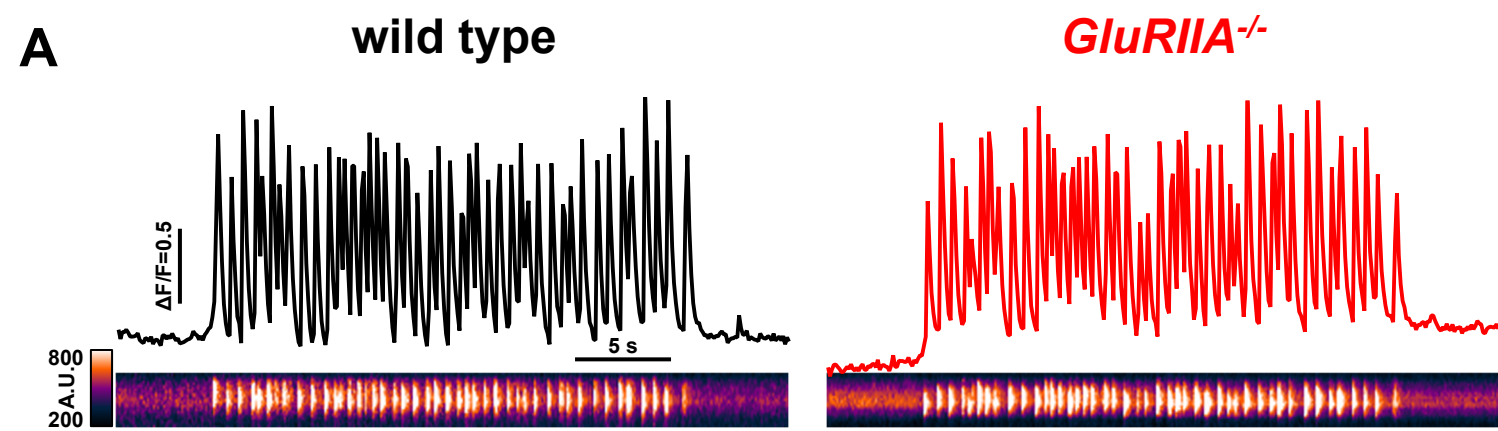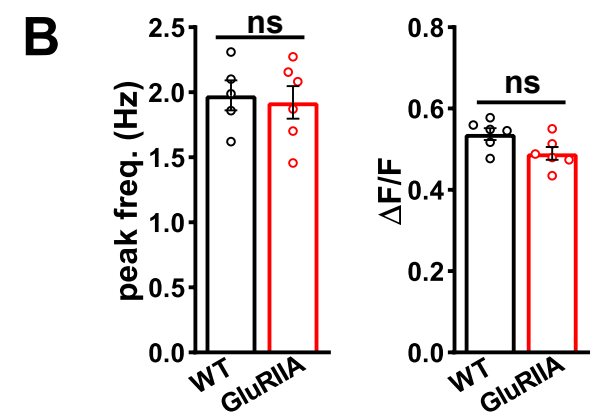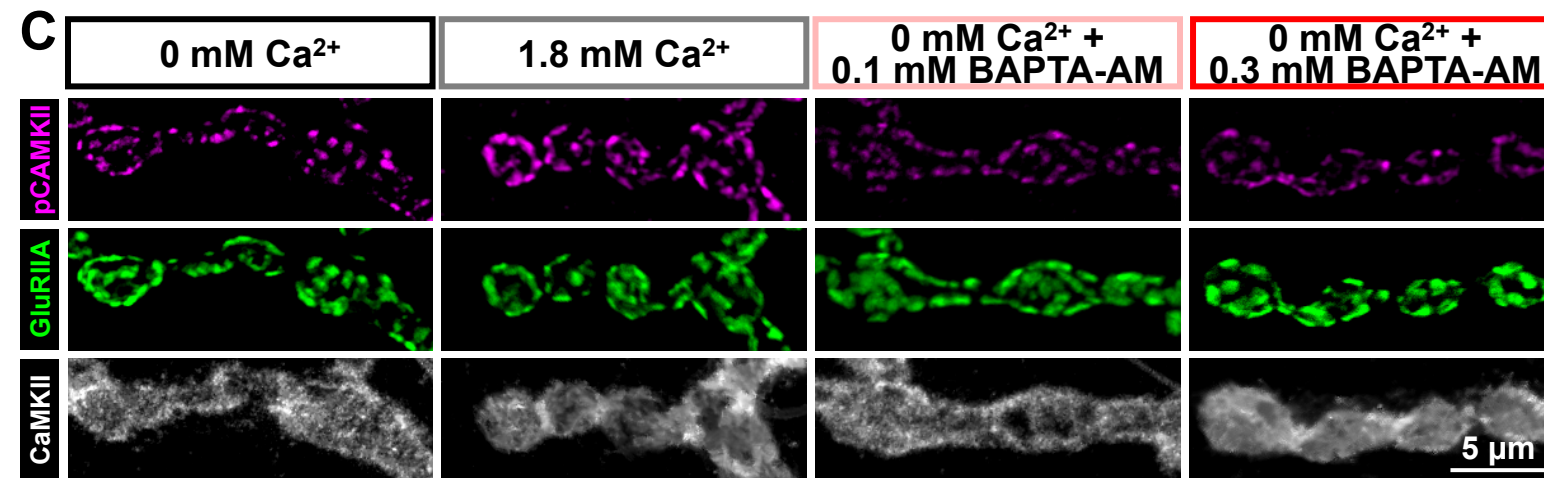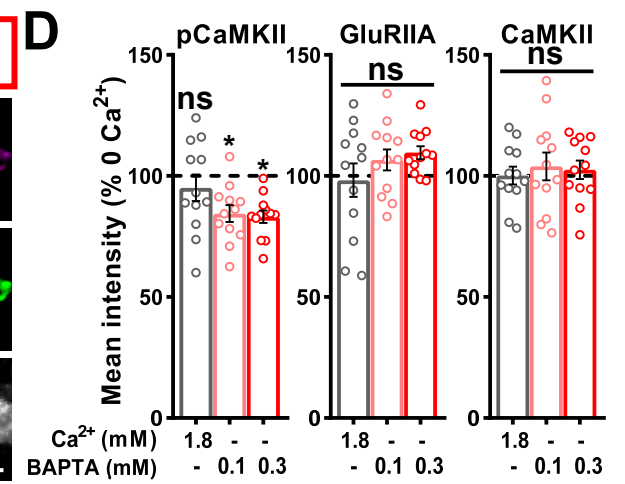

**Supplementary Figure S5: Evidence that pCaMKII levels are not significantly controlled by patterns of activity of intracellular Ca<sup>2+</sup> levels:** **(A)** Patterns of SynapGCaMP8f Ca<sup>2+</sup> transients imaged in semi-intact preparations at tonic Ib boutons of muscle 6 in wild type and *GluRIIA* mutants. Similar firing patterns are observed in both genotypes. **(B)** Quantification of firing frequency and amplitude of Ca<sup>2+</sup> transients imaged, with no significant differences observed between wild type and *GluRIIA* mutants. (wild type: n=6; *GluRIIA*<sup>-/-</sup>, n=6, p=0.7502 for peak frequency, p=0.0514 for  $\Delta F/F$ , unpaired, two-tailed t-test, with a significance value of 0.05). **(C)** Representative images of wild-type NMJs immunostained with anti-pCaMKII, -GluRIIA, and CaMKII in 0 Ca<sup>2+</sup> saline, saline supplemented with 1.8 mM Ca<sup>2+</sup>, or 0 Ca<sup>2+</sup> saline supplemented with 100 or 300  $\mu$ M BAPTA-AM. Experiments were repeated three times independently with similar results. A small but significant reduction in the pCaMKII signal is observed only after BAPTA-AM application. **(D)** Quantification of mean fluorescence intensity levels in the indicated conditions normalized to the 0 Ca<sup>2+</sup> control. (0 mM Ca<sup>2+</sup>: n=12; 1.8 mM Ca<sup>2+</sup>, n=12, p=0.7379 for pCaMKII, p=0.7147 for GluRIIA, p>0.9999 for CaMKII; 0 mM Ca<sup>2+</sup>+0.1 mM BAPTA: n=12, p=0.0280 for pCaMKII, p=0.9912 for GluRIIA, p=0.8353 for CaMKII; 0 mM Ca<sup>2+</sup>+0.3 mM BAPTA: n=12, p=0.0161 for pCaMKII, p=0.4475 for GluRIIA, p=0.9495 for CaMKII). Repeated measures One-way ANOVA with Dunnett's multiple comparisons test with a significance value of 0.05. p value adjusted for multiple comparison. Error bars indicate  $\pm$ SEM. Asterisks indicate statistical significance using t-test or One-way ANOVA: \*P<0.05, ns = not significant. n values indicate biologically independent NMJs. Absolute values for normalized data are summarized in Table S1. Source data are provided as a Source Data file.

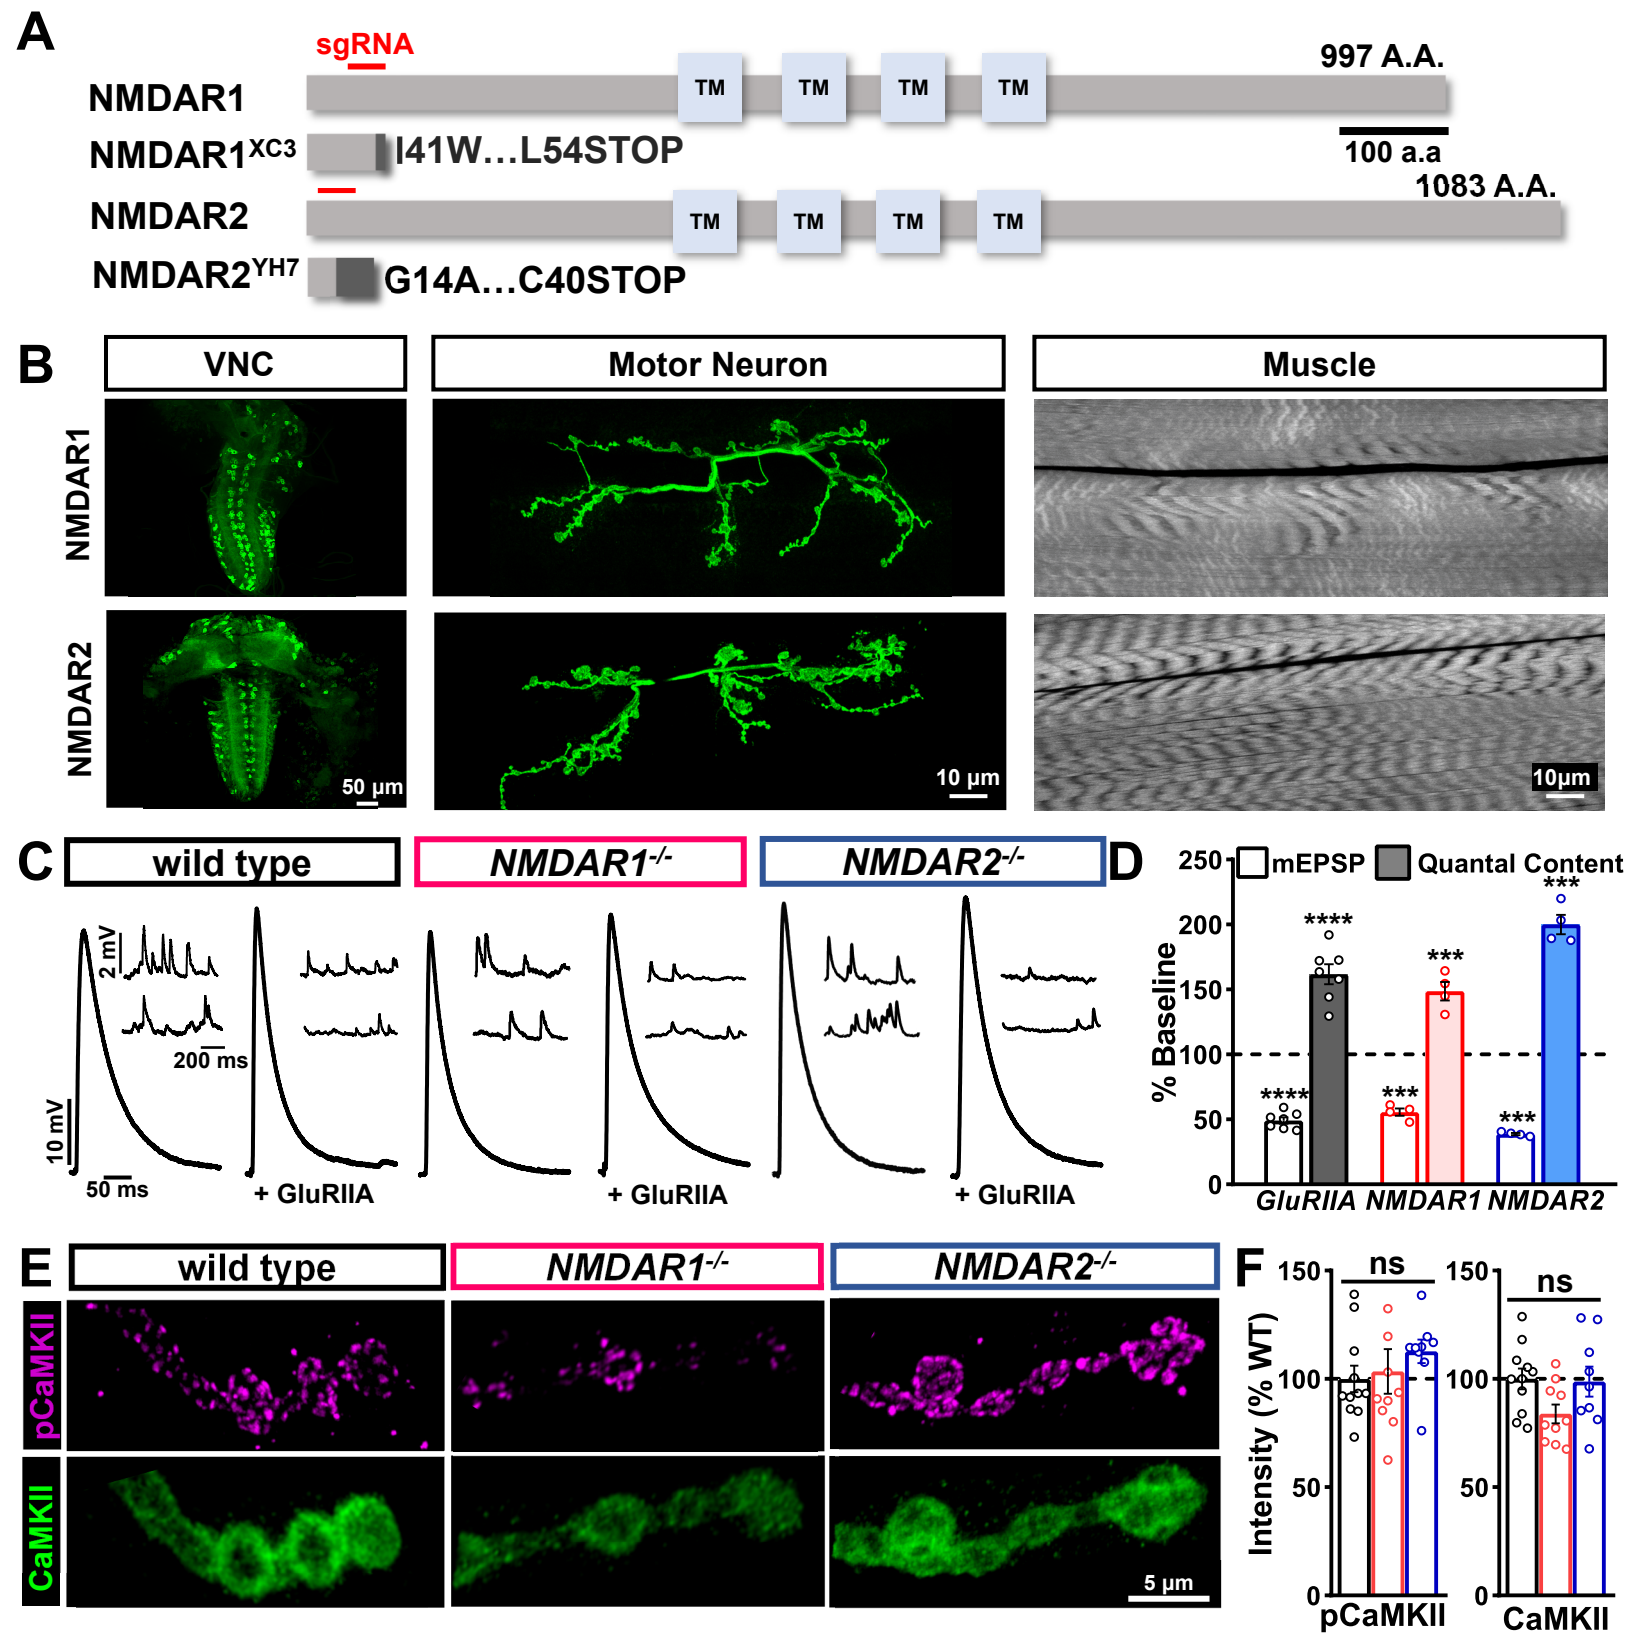

**Supplementary Figure S6: *Drosophila* NMDA receptors do not influence CaMKII activity or PHP expression.** (A) Schematics of the two NMDA receptors encoded in the *Drosophila* genome, NMDAR1 and NMDAR2. The amino acids targeted by the sgRNA for CRISPR/Cas9 mutagenesis are shown in red. Two NMDA mutant alleles generated are illustrated below, with frameshift mutations induced, encoding a short series of random amino acids (illustrated in black) and early termination at a stop codon. (B) Larval expression analysis of *T2A-GAL4* knock-ins of *NMDAR1* crossed to GFP reporters (*w;UAS-CD4::tdGFP/+;NMDAR1-T2A-GAL4/+*) and *NMDAR2* (*NMDAR2-T2A-GAL4/+;UAS-CD4::tdGFP/+;+*). Experiments were repeated three times independently with similar results. Note that both receptors are expressed broadly in the ventral nerve cord (VNC) and in motor neurons but are not expressed in muscle. (C) Representative electrophysiological traces from wild-type and NMDAR-mutant NMJs at baseline and in combination with *GluRIIA* mutations (*w;GluRIIA<sup>SP16</sup>;NMDAR1<sup>XC3</sup>* and *w,NMDAR2<sup>YH7</sup>;GluRIIA<sup>SP16</sup>*). (D) Quantification of mEPSP and quantal content values in the indicated genotypes normalized to baseline values (without *GluRIIA* mutant alleles). (wild type: n=10; *GluRIIA*<sup>-/-</sup>, n=7, p<0.0001 for mEPSP, p<0.0001 for QC; *NMDAR1*<sup>-/-</sup>, n=7; *NMDAR1*<sup>-/-</sup>+*GluRIIA*<sup>-/-</sup>, n=4, p=0.0001 for mEPSP, p=0.0010 for QC; *NMDAR2*<sup>-/-</sup>, n=4; *NMDAR2*<sup>-/-</sup>+*GluRIIA*<sup>-/-</sup>: n=4, p=0.0001 for mEPSP, p=0.0004 for QC, unpaired, two-tailed t-test, with a significance value of 0.05). Robust PHP expression is observed despite loss of *NMDAR1* or *NMDAR2*. (E) Representative immunostaining of pCaMKII and CaMKII at NMJs in the indicated genotypes. Experiments were repeated three times independently with similar results. (F) Quantification of pCaMKII and CaMKII mean intensity normalized as a percentage of wild-type values in the indicated genotypes. (wild type: n=11; *NMDAR1*<sup>-/-</sup>: n=10, p=0.9262 for pCaMKII, p>0.0689 for CaMKII; *NMDAR2*<sup>-/-</sup>: n=9, p=0.4086 for pCaMKII, p=0.9810 for CaMKII). Repeated measures One-way ANOVA with Dunnett's multiple comparisons test with a significance value of 0.05. p-value was adjusted for multiple comparison. No significant differences are observed. Error bars indicate  $\pm$ SEM. Asterisks indicate statistical significance using t-test or One-way ANOVA: \*\*\*P<0.001, \*\*\*\*P<0.0001, ns, not significant. n values indicate biologically independent NMJs. Absolute values for normalized data are summarized in Table S1. Source data are provided as a Source Data file.

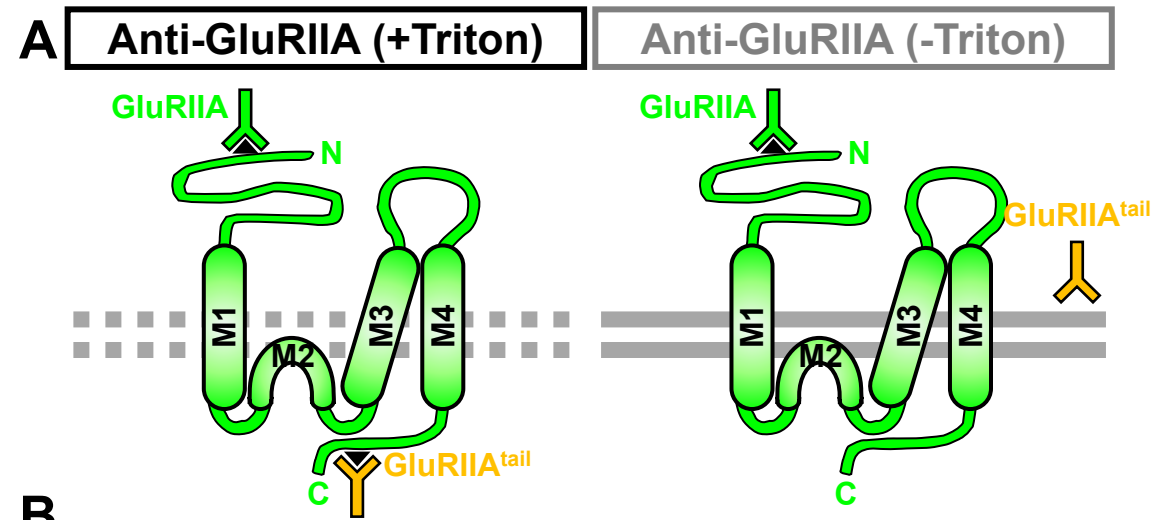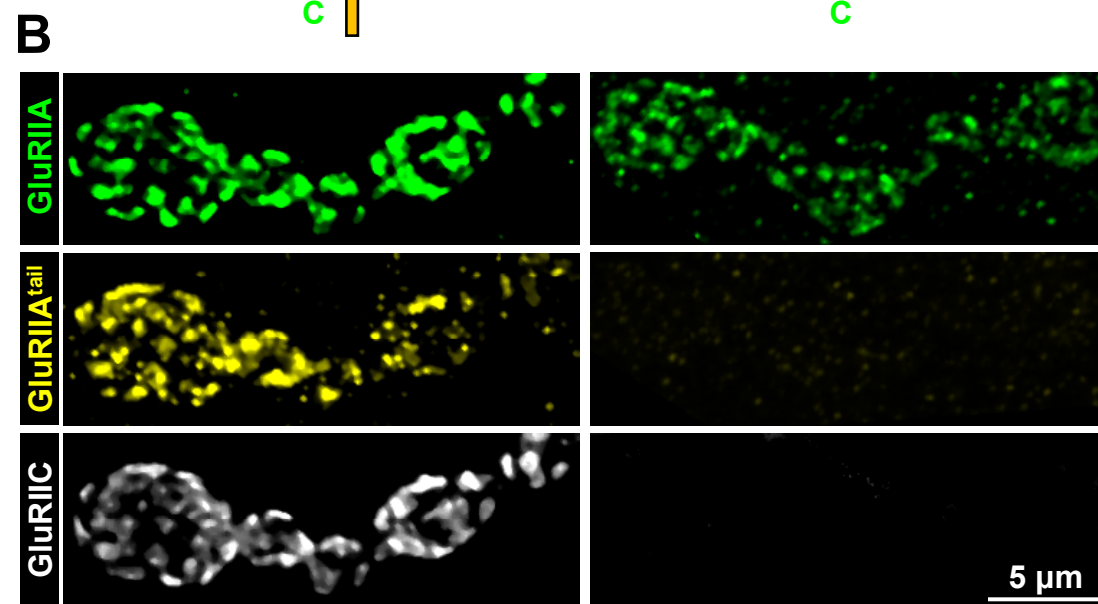

**Supplementary Figure S7: Antigenic topology of the monoclonal GluRIIA antibody 8B4D2. (A)** Schematic illustrating the membrane topology of the GluRIIA subunit and use of detergent (Triton) to determine the intracellular vs extracellular antigenic location of the monoclonal GluRIIA antibody 8B4D2. **(B)** Representative images of NMJ boutons immunostained with anti-GluRIIA, -GluRIIA<sup>tail</sup>, and -GluRIIC antibodies. Experiments were repeated three times independently with similar results. The antigenic region of the anti-GluRIIA monoclonal antibody resides in an extracellular region of GluRIIA, while both anti-GluRIIA<sup>tail</sup> and anti-GluRIIC antibodies recognize the intracellular C-tail of the relevant GluR subunit, as expected.

**Supplementary Table 1: Absolute values for normalized data and additional statistical details.** The figure and panel, genotype, and conditions are noted. Average values (with standard error of the mean noted in parentheses), data samples (n), and statistical significance tests and values are shown for all data.

| Figure | Label                                                         | Genotype                                                                                                             | mEPSP amplitude (mV)      | EPSP amplitude (mV)       | QC                        | mEPSP frequency (Hz)     | Rinput (M $\Omega$ )     | Resing potential (mV)      | n  | P Value (significance): mEPSP, EPSP, QC          |
|--------|---------------------------------------------------------------|----------------------------------------------------------------------------------------------------------------------|---------------------------|---------------------------|---------------------------|--------------------------|--------------------------|----------------------------|----|--------------------------------------------------|
| 1C     | wild type                                                     | <i>w<sup>1118</sup></i>                                                                                              | 1.035<br>( $\pm 0.045$ )  | 33.297<br>( $\pm 1.980$ ) | 32.125<br>( $\pm 1.100$ ) | 3.540<br>( $\pm 1.100$ ) | 9.50<br>( $\pm 0.307$ )  | -69.172<br>( $\pm 1.707$ ) | 10 | -                                                |
| 1C     | <i>GluRIIA<sup>-/-</sup></i>                                  | <i>w;GluRIIA<sup>SP16</sup></i>                                                                                      | 0.463<br>( $\pm 0.027$ )  | 31.493<br>( $\pm 0.920$ ) | 69.123<br>( $\pm 2.271$ ) | 2.978<br>( $\pm 0.097$ ) | 11.50<br>( $\pm 0.268$ ) | -71.986<br>( $\pm 1.611$ ) | 10 | <0.0001 (****),<br>0.421 (ns),<br><0.0001 (****) |
| 1C     | G14>CaMKII <sup>T287D</sup>                                   | <i>w;G14-GAL4/+;</i><br><i>UAS-CaMKII<sup>T287D</sup>/+</i>                                                          | 1.000<br>( $\pm 0.053$ )  | 34.777<br>( $\pm 1.962$ ) | 34.707<br>( $\pm 0.520$ ) | 3.883<br>( $\pm 1.962$ ) | 10.20<br>( $\pm 10.2$ )  | -66.131<br>( $\pm 2.383$ ) | 10 | -                                                |
| 1C     | G14>CaMKII <sup>T287D</sup><br>+ <i>GluRIIA<sup>-/-</sup></i> | <i>w;G14-</i><br><i>GAL4,GluRIIA<sup>SP16</sup>/GluRIIA<sup>SP16</sup>,</i><br><i>UAS-CaMKII<sup>T287D</sup>/+</i>   | 0.446<br>( $\pm 0.017$ )  | 16.213<br>( $\pm 0.365$ ) | 69.123<br>( $\pm 2.271$ ) | 3.065<br>( $\pm 0.186$ ) | 11.80<br>( $\pm 0.359$ ) | -72.855<br>( $\pm 2.812$ ) | 10 | <0.0001 (****),<br>0.0001 (****),<br><0.072 (ns) |
| 3A     | wild type                                                     | <i>w<sup>1118</sup></i>                                                                                              | 1.035<br>( $\pm 0.083$ )  | 31.78<br>( $\pm 1.144$ )  | 32.46<br>( $\pm 3.376$ )  | 2.856<br>( $\pm 0.143$ ) | ???<br>( $\pm$ )         | ???<br>( $\pm$ )           | 8  | -                                                |
| 3A     | OK319>BoNT-C                                                  | <i>w;OK319-GAL4/+;</i><br><i>UAS-BoNT-C/+</i>                                                                        | 0.0512<br>( $\pm 0.023$ ) | 1.43<br>( $\pm 0.29$ )    | -                         | 0.044<br>( $\pm 0.02$ )  | 7.63<br>( $\pm 0.46$ )   | -74.59<br>( $\pm 3.40$ )   | 8  | <0.0001 (****),<br>0.0001 (****)                 |
| 4B-D   | wild type                                                     | <i>w<sup>1118</sup></i>                                                                                              | 1.018<br>( $\pm 1.018$ )  | 31.038<br>( $\pm 0.907$ ) | 31.503<br>( $\pm 2.253$ ) | 3.530<br>( $\pm 0.082$ ) | 9.41<br>( $\pm 0.608$ )  | -69.179<br>( $\pm 2.174$ ) | 12 | -                                                |
| 4B-D   | <i>GluRIIA<sup>-/-</sup></i>                                  | <i>w;GluRIIA<sup>SP16</sup></i>                                                                                      | 0.433<br>( $\pm 0.025$ )  | 29.203<br>( $\pm 1.117$ ) | 69.670<br>( $\pm 4.543$ ) | 3.095<br>( $\pm 0.263$ ) | 10.91<br>( $\pm 0.56$ )  | -71.927<br>( $\pm 1.532$ ) | 12 | <0.0001 (****),<br>0.646 (ns),<br><0.0001 (****) |
| 4B-D   | <i>GluRIIA<sup>Q615R</sup></i>                                | <i>w;GluRIIA<sup>Q615R</sup></i>                                                                                     | 0.983<br>( $\pm 0.027$ )  | 32.968<br>( $\pm 1.041$ ) | 33.579<br>( $\pm 0.884$ ) | 3.439<br>( $\pm 0.095$ ) | 13.00<br>( $\pm 0.507$ ) | -67.363<br>( $\pm 1.966$ ) | 12 | 0.946 (ns),<br>0.607 (ns),<br>0.942 (ns)         |
| 4B-D   | G14>PV                                                        | <i>w;G14-GAL4/+;</i><br><i>UAS-PV/+</i>                                                                              | 1.020<br>( $\pm 0.053$ )  | 26.675<br>( $\pm 1.670$ ) | 26.442<br>( $\pm 1.533$ ) | 3.607<br>( $\pm 0.124$ ) | 9.08<br>( $\pm 0.542$ )  | -67.656<br>( $\pm 2.418$ ) | 12 | 0.999 (ns),<br>0.041 (*),<br>0.437 (ns)          |
| 4B-D   | G14>PV<br>+ <i>GluRIIA<sup>Q615R</sup></i>                    | <i>w;GluRIIA<sup>Q615R</sup>,G14-</i><br><i>GAL4/GluRIIA<sup>Q615R</sup>,</i><br><i>UAS-PV/+</i>                     | 0.968<br>( $\pm 0.047$ )  | 31.983<br>( $\pm 1.030$ ) | 33.966<br>( $\pm 1.933$ ) | 3.517<br>( $\pm 0.119$ ) | 11.46<br>( $\pm 0.417$ ) | -69.740<br>( $\pm 1.073$ ) | 13 | 0.812 (ns),<br>0.942 (ns),<br>0.893 (ns)         |
| 6B-D   | wild type                                                     | <i>w<sup>1118</sup></i>                                                                                              | 0.967<br>( $\pm 0.070$ )  | 29.844<br>( $\pm 1.016$ ) | 32.255<br>( $\pm 2.184$ ) | 3.049<br>( $\pm 0.108$ ) | 8.00<br>( $\pm 0.301$ )  | -65.333<br>( $\pm 3.027$ ) | 11 | -                                                |
| 6B-D   | <i>GluRIIA<sup>-/-</sup></i>                                  | <i>w;GluRIIA<sup>SP16</sup></i>                                                                                      | 0.475<br>( $\pm 0.028$ )  | 27.041<br>( $\pm 0.786$ ) | 58.885<br>( $\pm 3.936$ ) | 2.805<br>( $\pm 0.137$ ) | 11.00<br>( $\pm 0.333$ ) | -66.874<br>( $\pm 3.300$ ) | 10 | <0.0001 (****),<br>0.276 (ns),<br><0.0001 (****) |
| 6B-D   | <i>GluRIIA<sup>ΔC20</sup></i>                                 | <i>w;GluRIIA<sup>ΔC20</sup></i>                                                                                      | 1.045<br>( $\pm 0.053$ )  | 30.345<br>( $\pm 0.753$ ) | 30.108<br>( $\pm 1.956$ ) | 3.097<br>( $\pm 0.270$ ) | 9.30<br>( $\pm 0.307$ )  | -69.720<br>( $\pm 2.299$ ) | 13 | 0.682 (ns),<br>0.992 (ns),<br>0.921 (ns)         |
| 6B-D   | <i>GluRIIA<sup>ΔC9</sup></i>                                  | <i>w;GluRIIA<sup>ΔC9</sup></i>                                                                                       | 1.099<br>( $\pm 0.036$ )  | 32.151<br>( $\pm 0.738$ ) | 29.661<br>( $\pm 1.262$ ) | 2.884<br>( $\pm 0.422$ ) | 12.42<br>( $\pm 0.453$ ) | -69.533<br>( $\pm 2.688$ ) | 14 | 0.230 (ns),<br>0.371 (ns),<br>0.852 (ns)         |
| 6B-D   | <i>GluRIIA<sup>QRΔC19</sup></i>                               | <i>w;GluRIIA<sup>QRΔC19</sup></i>                                                                                    | 1.000<br>( $\pm 0.069$ )  | 32.980<br>( $\pm 1.972$ ) | 34.678<br>( $\pm 2.997$ ) | 2.749<br>( $\pm 0.169$ ) | 12.90<br>( $\pm 0.414$ ) | -69.449<br>( $\pm 3.077$ ) | 11 | 0.980 (ns),<br>0.176 (ns),<br>0.905 (ns)         |
| 8C-E   | wild type                                                     | <i>w<sup>1118</sup></i>                                                                                              | 1.029<br>( $\pm 0.051$ )  | 31.476<br>( $\pm 1.345$ ) | 31.421<br>( $\pm 2.213$ ) | 2.879<br>( $\pm 0.070$ ) | 12.00<br>( $\pm 0.381$ ) | -66.272<br>( $\pm 3.715$ ) | 12 | -                                                |
| 8C-E   | <i>GluRIIA<sup>-/-</sup></i>                                  | <i>w;GluRIIA<sup>SP16</sup></i>                                                                                      | 0.038<br>( $\pm 0.051$ )  | 28.283<br>( $\pm 1.265$ ) | 63.079<br>( $\pm 4.979$ ) | 2.563<br>( $\pm 0.094$ ) | 8.90<br>( $\pm 0.433$ )  | -66.272<br>( $\pm 2.485$ ) | 10 | <0.0001 (****),<br>0.331 (ns),<br><0.0001 (****) |
| 8C-E   | G14>GluRIIB<br>(IIA/IIB null)                                 | <i>w;G14-</i><br><i>GAL4,GluRIIA<sup>SP22</sup>/Df(2L)c<sup>fl4</sup>,</i><br><i>UAS-GluRIIB/+</i>                   | 0.471<br>( $\pm 0.031$ )  | 29.264<br>( $\pm 2.159$ ) | 65.435<br>( $\pm 6.023$ ) | 2.915<br>( $\pm 0.149$ ) | 11.90<br>( $\pm 0.563$ ) | -62.019<br>( $\pm 2.631$ ) | 11 | <0.0001 (****),<br>0.596 (ns),<br><0.0001 (****) |
| 8C-E   | G14>GluRIIB <sup>IIAtail</sup><br>(IIA/IIB null)              | <i>w;G14-GAL4,</i><br><i>GluRIIA<sup>SP22</sup>/Df(2L)c<sup>fl4</sup>,</i><br><i>UAS-GluRIIB<sup>IIAtail</sup>/+</i> | 0.466<br>( $\pm 0.033$ )  | 17.084<br>( $\pm 0.977$ ) | 38.857<br>( $\pm 3.815$ ) | 2.697<br>( $\pm 0.151$ ) | 10.91<br>( $\pm 0.312$ ) | -72.750<br>( $\pm 3.831$ ) | 12 | <0.0001 (****),<br><0.0001 (****),<br>0.490 (ns) |
| S3     | wild type                                                     | <i>w<sup>1118</sup></i>                                                                                              | 1.054<br>( $\pm 0.047$ )  | 30.539<br>( $\pm 2.015$ ) | 30.546<br>( $\pm 1.924$ ) | 3.027<br>( $\pm 0.089$ ) | 9.56<br>( $\pm 0.772$ )  | -65.493<br>( $\pm 4.576$ ) | 10 | -                                                |
| S3     | MHC>GluRIIA <sup>M614R</sup>                                  | <i>w;UAS-GluRIIA<sup>M614R</sup>/+;</i><br><i>MHC-GAL4/+</i>                                                         | 0.506<br>( $\pm 0.021$ )  | 33.400<br>( $\pm 0.785$ ) | 66.560<br>( $\pm 2.759$ ) | 2.697<br>( $\pm 0.151$ ) | 10.91<br>( $\pm 0.312$ ) | -66.830<br>( $\pm 7.637$ ) | 6  | <0.0001 (****),<br>0.573 (ns),<br><0.0001 (****) |
| S6D    | wild type                                                     | <i>w<sup>1118</sup></i>                                                                                              | 1.120<br>( $\pm 0.062$ )  | 36.739<br>( $\pm 1.566$ ) | 33.256<br>( $\pm 1.537$ ) | 3.649<br>( $\pm 0.089$ ) | 15.20<br>( $\pm 0.742$ ) | -72.744<br>( $\pm 3.105$ ) | 10 | -                                                |
| S6D    | <i>GluRIIA<sup>-/-</sup></i>                                  | <i>w;GluRIIA<sup>SP16</sup></i>                                                                                      | 0.551<br>( $\pm 0.027$ )  | 29.308<br>( $\pm 1.566$ ) | 53.780<br>( $\pm 2.571$ ) | 3.026<br>( $\pm 0.212$ ) | 15.85<br>( $\pm 0.340$ ) | -67.601<br>( $\pm 3.105$ ) | 7  | <0.0001 (****),<br><0.05 (*),<br><0.0001 (****)  |
| S6D    | <i>NMDAR1<sup>-/-</sup></i>                                   | <i>NMDAR1<sup>XC3</sup></i>                                                                                          | 0.968<br>( $\pm 0.027$ )  | 38.507<br>( $\pm 1.555$ ) | 40.442<br>( $\pm 2.586$ ) | 4.038<br>( $\pm 0.408$ ) | 10.00<br>( $\pm 0.308$ ) | -64.621<br>( $\pm 1.368$ ) | 7  | -                                                |
| S6D    | <i>NMDAR1<sup>-/-</sup></i><br>+ <i>GluRIIA<sup>-/-</sup></i> | <i>NMDAR1<sup>XC3</sup>;GluRIIA<sup>SP16</sup></i>                                                                   | 0.538<br>( $\pm 0.026$ )  | 32.277<br>( $\pm 1.762$ ) | 60.094<br>( $\pm 2.893$ ) | 2.558<br>( $\pm 0.281$ ) | 15.75<br>( $\pm 0.750$ ) | -71.996<br>( $\pm 1.471$ ) | 4  | <0.001 (***),<br><0.01 (**),<br><0.001 (***)     |
| S6D    | <i>NMDAR2<sup>-/-</sup></i>                                   | <i>NMDAR2<sup>YH7</sup></i>                                                                                          | 1.349<br>( $\pm 0.093$ )  | 37.346<br>( $\pm 1.990$ ) | 28.270<br>( $\pm 3.315$ ) | 3.291<br>( $\pm 0.689$ ) | 14.50<br>( $\pm 0.866$ ) | -65.997<br>( $\pm 1.352$ ) | 4  | -                                                |
| S6D    | <i>NMDAR2<sup>-/-</sup></i><br>+ <i>GluRIIA<sup>-/-</sup></i> | <i>NMDAR1<sup>YH7</sup>;GluRIIA<sup>SP16</sup></i>                                                                   | 0.523<br>( $\pm 0.011$ )  | 29.559<br>( $\pm 0.953$ ) | 56.582<br>( $\pm 2.114$ ) | 2.212<br>( $\pm 0.375$ ) | 21.25<br>( $\pm 0.629$ ) | -70.517<br>( $\pm 1.497$ ) | 4  | <0.001 (***),<br><0.05 (*),<br><0.001 (***)      |



| Figure | Label                                   | Genotypes                                                                                 | Quantal size ( $\Delta F/F$ ) | n  | P Value (significance): |
|--------|-----------------------------------------|-------------------------------------------------------------------------------------------|-------------------------------|----|-------------------------|
| 2F     | wild type                               | <i>w<sub>1</sub>+</i> ;MHC>GCaMP6f/+                                                      | 0.020 ( $\pm 0.00091$ )       | 12 | -                       |
| 2F     | <i>GluRIIA</i> <sup>-/-</sup>           | <i>W</i> ;GluRIIA <sup>SP16</sup> ;MHC>GCaMP6f/+                                          | 0.010 ( $\pm 0.00026$ )       | 12 | <0.0001 (****)          |
| 2F     | G14>PV                                  | <i>w</i> ;G14-GAL4/+;UAS-PV/MHC>GCaMP6f                                                   | 0.138 ( $\pm 0.00061$ )       | 11 | <0.0001 (****)          |
| 2F     | <i>GluRIIA</i> <sup>Q615R</sup>         | <i>w</i> ;GluRIIA <sup>Q615R</sup> ;MHC>GCaMP6f/+                                         | 0.010 ( $\pm 0.00033$ )       | 12 | <0.0001 (****)          |
| 2F     | G14>PV+ <i>GluRIIA</i> <sup>Q615R</sup> | <i>w</i> ;GluRIIA <sup>Q615R</sup> ;G14-GAL4/GluRIIA <sup>Q615R</sup> ;UAS-PV/MHC>GCaMP6f | 0.0077 ( $\pm 0.00034$ )      | 12 | <0.0001 (****)          |
| 3B     | MHC>GCaMP8f                             | <i>w<sub>1</sub>+</i> ;MHC>GCaMP8f/+                                                      | 0.0354 ( $\pm 0.00672$ )      | 8  | -                       |
| 3B     | + OK319>BoNT-C                          | <i>w</i> ;OK319-GAL4/+;MHC>GCaMP8f/UAS-BoNT-C                                             | 0.0013 ( $\pm 0.00007$ )      | 8  | <0.0001 (****)          |

| Figure | Label                         | Genotypes                                        | Quantal size ( $\Delta F/F$ ) | Frequency (Hz)         | n | P Value (significance):<br>Quantal size, Frequency |
|--------|-------------------------------|--------------------------------------------------|-------------------------------|------------------------|---|----------------------------------------------------|
| S5B    | wild type                     | <i>w<sub>1</sub>+</i> ;MHC>GCaMP6f/+             | 0.537 ( $\pm 0.0145$ )        | 1.975 ( $\pm 0.0943$ ) | 6 | -                                                  |
| S5B    | <i>GluRIIA</i> <sup>-/-</sup> | <i>W</i> ;GluRIIA <sup>SP16</sup> ;MHC>GCaMP6f/+ | 0.490 ( $\pm 0.0158$ )        | 1.923 ( $\pm 0.1251$ ) | 6 | 0.8513 (ns),<br>0.5505 (ns)                        |

| Figure | Label                         | Genotypes                                        | Quantal size ( $\Delta F/F$ ) | Frequency (Hz)         | n | P Value (significance):<br>Quantal size, Frequency |
|--------|-------------------------------|--------------------------------------------------|-------------------------------|------------------------|---|----------------------------------------------------|
| S2WB   | wild type                     | <i>w<sub>1</sub>+</i> ;MHC>GCaMP6f/+             | 0.537 ( $\pm 0.0145$ )        | 1.975 ( $\pm 0.0943$ ) | 6 | -                                                  |
| S2WB   | <i>GluRIIA</i> <sup>-/-</sup> | <i>W</i> ;GluRIIA <sup>SP16</sup> ;MHC>GCaMP6f/+ | 0.490 ( $\pm 0.0158$ )        | 1.923 ( $\pm 0.1251$ ) | 6 | 0.8513 (ns),<br>0.5505 (ns)                        |

**Supplementary Table 2**

| REAGENT/RESOURCE                                            | SOURCE                                      | IDENTIFIER                            |
|-------------------------------------------------------------|---------------------------------------------|---------------------------------------|
| <b>Antibodies</b>                                           |                                             |                                       |
| Mouse anti-GluRIIA (8B4D2)                                  | Developmental Studies Hybridoma Bank (DSHB) | AB_528269                             |
| Mouse anti-DLG (4F3)                                        | DSHB                                        | AB_528203                             |
| Mouse anti- $\beta$ -tubulin (E7)                           | DSHB                                        | AB_2315513                            |
| Rabbit anti-parvalbumin                                     | Thermo Fisher                               | Pa1-933                               |
| Rabbit anti-GluRIIB                                         | (Perry et al., 2017)                        |                                       |
| Rabbit anti-GluRIIC                                         | (Goel and Dickman, 2018)                    |                                       |
| Guinea pig anti-GluRIID                                     | (Perry et al., 2017)                        |                                       |
| Affinity purified Rabbit anti-pCaMKII                       | This study                                  |                                       |
| Affinity purified Guinea pig anti-CaMKII                    | This study                                  |                                       |
| Affinity purified Guinea pig anti-GluRIIA C-tail            | This study                                  |                                       |
| Alexa Fluor 647 conjugated Goat anti-Horseradish Peroxidase | Jackson ImmunoResearch Laboratories         | 123-605-021                           |
| Alexa Fluor 488 conjugated secondary antibodies             | Jackson ImmunoResearch Laboratories         | 706-545-148, 715-545-150, 711-545-152 |
| Cy3-conjugated secondary antibodies                         | Jackson ImmunoResearch Laboratories         | 706-165-148, 715-165-150, 711-165-152 |
| DyLight 405-conjugated secondary antibodies                 | Jackson ImmunoResearch Laboratories         | 706-475-148, 715-475-150              |
| Horseradish Peroxidase conjugated secondary antibodies      | Jackson ImmunoResearch Laboratories         | 115-035-003, 106-035-003              |
| <b>Drosophila Strains</b>                                   |                                             |                                       |
| UAS-PV                                                      | This study                                  |                                       |
| UAS-GluRIIB                                                 | This study                                  |                                       |
| GluRIIA <sup>Q615R</sup>                                    | This study                                  |                                       |
| GluRIIA <sup><math>\Delta</math>C20</sup>                   | This study                                  |                                       |
| GluRIIA <sup><math>\Delta</math>C6</sup>                    | This study                                  |                                       |
| GluRIIA <sup>QRAC19</sup>                                   | This study                                  |                                       |
| UAS-GluRIIB <sup>IIAtail</sup>                              | This study                                  |                                       |
| SynapGCaMP8f                                                | This study                                  |                                       |
| NMDAR1 <sup>XC3</sup>                                       | (Li et al., 2021)                           |                                       |
| NMDAR2 <sup>YH7</sup>                                       | (Li et al., 2021)                           |                                       |
| G14-GAL4                                                    | (Aberle et al., 2002)                       |                                       |
| MHC-GAL4                                                    | (Schuster et al., 1996)                     |                                       |
| OK319-GAL4                                                  | (Sweeney et al., 1995)                      |                                       |
| MHC-CD8-GCaMP6f-Sh                                          | (Newman et al., 2017)                       |                                       |
| GluRIIA <sup>SP22</sup>                                     | (Diantonio et al., 1999)                    |                                       |
| UAS-CaMKII <sup>Ntide</sup>                                 | (Chang et al., 1998)                        |                                       |
| GluRIIA <sup>SP16</sup>                                     | (Petersen et al., 1997)                     |                                       |
| UAS-BoNT-C                                                  | (Ramesh et al., 2021)                       |                                       |
| NMDAR1-T2A-GAL4                                             | (Kondo et al., 2020)                        |                                       |
| NMDAR2-T2A-GAL4                                             | (Kondo et al., 2020)                        |                                       |
| UAS-CaMKII <sup>T287D</sup>                                 | Bloomington Drosophila Stock Center (BDSC)  | 29665                                 |
| UAS-CaMKII <sup>T287A</sup>                                 | BDSC                                        | 29663                                 |
| UAS-CaMKII <sup>A<sup>la</sup></sup>                        | BDSC                                        | 29666                                 |

|                              |      |       |
|------------------------------|------|-------|
| UAS-CaMKII                   | BDSC | 29662 |
| UAS-CaMKII <sup>RNAi</sup>   | BDSC | 35330 |
| nos-Cas9                     | BDSC | 78782 |
| Tub-PBac                     | BDSC | 8283  |
| attP2                        | BDSC | 8622  |
| w <sup>1118</sup>            | BDSC | 5905  |
| UAS-GluRIIA <sup>M614R</sup> | BDSC | 64256 |
| Df(2L)cl <sup>h4</sup>       | BDSC | 6304  |

#### Construct

|               |         |        |
|---------------|---------|--------|
| pACU          | Addgene | 58373  |
| pACU2         | Addgene | 31223  |
| pAC-U63-tgRNA | Addgene | 112811 |
| pHD-DsRed     | Addgene | 51434  |

#### Chemical

|          |       |        |
|----------|-------|--------|
| BAPTA-AM | Abcam | 120503 |
|----------|-------|--------|

#### Software and Algorithms

|                       |                       |         |
|-----------------------|-----------------------|---------|
| NIS Elements software | Nikon                 | 4.51.01 |
| Axon pCLAMP Clampfit  | Molecular Devices     | 10.7    |
| MiniAnalysis          | Synaptosoft           | 6.0.3   |
| Excel                 | Microsoft             | 2016    |
| GraphPad Prism        | GraphPad              | 8.0.1   |
| Jupyter Notebook      | Anaconda              | 6.0.1   |
| ImageJ (Fiji)         | (Rueden et al., 2017) |         |

### Supplementary References

Aberle, H., Haghghi, A.P., Fetter, R.D., McCabe, B.D., Magalhães, T.R., and Goodman, C.S. (2002). Wishful thinking encodes a BMP type II receptor that regulates synaptic growth in *Drosophila*. *Neuron* 33, 545–558. [https://doi.org/10.1016/S0896-6273\(02\)00589-5](https://doi.org/10.1016/S0896-6273(02)00589-5).

Chang, B.H., Mukherji, S., and Soderling, T.R. (1998). Characterization of a calmodulin kinase II inhibitor protein in brain. *Proceedings of the National Academy of Sciences* 95. .

Diantonio, A., Petersen, S.A., Heckmann, M., and Goodman, C.S. (1999). Glutamate receptor expression regulates quantal size and quantal content at the *Drosophila* neuromuscular junction. *Journal of Neuroscience* 19. <https://doi.org/10.1523/jneurosci.19-08-03023.1999>.

Goel, P., and Dickman, D. (2018). Distinct homeostatic modulations stabilize reduced postsynaptic receptivity in response to presynaptic DLK signaling. *Nature Communications* 9, 1–14. <https://doi.org/10.1038/s41467-018-04270-0>.

Kondo, S., Takahashi, T., Yamagata, N., Imanishi, Y., Katow, H., Hiramatsu, S., Lynn, K., Abe, A., Kumaraswamy, A., and Tanimoto, H. (2020). Neurochemical Organization of the *Drosophila* Brain Visualized by Endogenously Tagged Neurotransmitter Receptors. *Cell Reports* 30, 284-297.e5. <https://doi.org/10.1016/J.CELREP.2019.12.018/ATTACHMENT/EDF3DE7F-C3FD-42D5-83CD-87E341B7BBA9/MMC2.XLSX>.

Li, X., Chien, C., Han, Y., Sun, Z., Chen, X., and Dickman, D. (2021). Autocrine inhibition by a glutamate-gated chloride channel mediates presynaptic homeostatic depression. *Science Advances* 7, 1215.

[https://doi.org/10.1126/SCIADV.ABJ1215/SUPPL\\_FILE/SCIADV.ABJ1215\\_SM.PDF](https://doi.org/10.1126/SCIADV.ABJ1215/SUPPL_FILE/SCIADV.ABJ1215_SM.PDF).

Newman, Z.L., Hoagland, A., Aghi, K., Worden, K., Levy, S.L., Son, J.H., Lee, L.P., and Isacoff, E.Y. (2017). Input-Specific Plasticity and Homeostasis at the *Drosophila* Larval Neuromuscular Junction. *Neuron* 93, 1388-1404.e10. <https://doi.org/10.1016/j.neuron.2017.02.028>.

Perry, S., Han, Y., Das, A., and Dickman, D. (2017). Homeostatic plasticity can be induced and expressed to restore synaptic strength at neuromuscular junctions undergoing ALS-related degeneration. *Human Molecular Genetics* 26, 4153–4167. <https://doi.org/10.1093/hmg/ddx304>.

Petersen, S.A., Fetter, R.D., Noordermeer, J.N., Goodman, C.S., and DiAntonio, A. (1997). Genetic analysis of glutamate receptors in *drosophila* reveals a retrograde signal regulating presynaptic transmitter release. *Neuron* 19, 1237–1248. [https://doi.org/10.1016/S0896-6273\(00\)80415-8](https://doi.org/10.1016/S0896-6273(00)80415-8).

Ramesh, N., Escher, M.J.F., Mampell, M.M., Böhme, M.A., Götz, T.W.B., Goel, P., Matkovic, T., Petzoldt, A.G., Dickman, D., and Sigrist, S.J. (2021). Antagonistic interactions between two Neuroligins coordinate pre- and postsynaptic assembly. *Current Biology* 31, 1711-1725.e5. <https://doi.org/10.1016/J.CUB.2021.01.093>.

Rueden, C.T., Schindelin, J., Hiner, M.C., DeZonia, B.E., Walter, A.E., Arena, E.T., and Eliceiri, K.W. (2017). ImageJ2: ImageJ for the next generation of scientific image data. *BMC Bioinformatics* 18, 1–26. <https://doi.org/10.1186/s12859-017-1934-z>.

Schuster, C.M., Davis, G.W., Fetter, R.D., and Goodman, C.S. (1996). Genetic dissection of structural and functional components of synaptic plasticity. I. Fasciclin II controls synaptic stabilization and growth. *Neuron* 17, 641–654. [https://doi.org/10.1016/S0896-6273\(00\)80197-X](https://doi.org/10.1016/S0896-6273(00)80197-X).

Sweeney, S.T., Broadie, K., Keane, J., Niemann, H., and O’Kane, C.J. (1995). Targeted expression of tetanus toxin light chain in *Drosophila* specifically eliminates synaptic transmission and causes behavioral defects. *Neuron* 14, 341–351. [https://doi.org/10.1016/0896-6273\(95\)90290-2](https://doi.org/10.1016/0896-6273(95)90290-2).
